# Supplementary material for: Nationally-representative serostudy of dengue in Bangladesh allows generalizable disease burden estimates
Source: eLife journal article supplement (doi:10.7554/elife.42869), 2019-04-08
Supplement: supp [file elife-42869-supp-v1.zip]

Archive with 8 entries (8 files):
- elife_poa_e42869_Figure_2_figure_supplement_1.pdf
- elife_poa_e42869_Figure_1_figure_supplement_3.pdf
- elife_poa_e42869_Transparent_Reporting_File.docx
- elife_poa_e42869_Figure_2_figure_supplement_3.pdf
- elife_poa_e42869_Figure_1_figure_supplement_2.pdf
- elife_poa_e42869_Figure_1_figure_supplement_1.pdf
- elife_poa_e42869_Figure_2_figure_supplement_4.pdf
- elife_poa_e42869_Figure_2_figure_supplement_2.pdf
