# Supplementary material for: Nationally-representative serostudy of dengue in Bangladesh allows generalizable disease burden estimates
Source: eLife journal article supplement (doi:10.7554/elife.42869), 2019-04-08

7,764 individuals  
across 1,419  
households

1,532 individuals  
absent or refused  
any participation

6,232 individuals

336 individuals  
refused blood draw  
only

5,866 individuals  
with questionnaire  
and serum sample

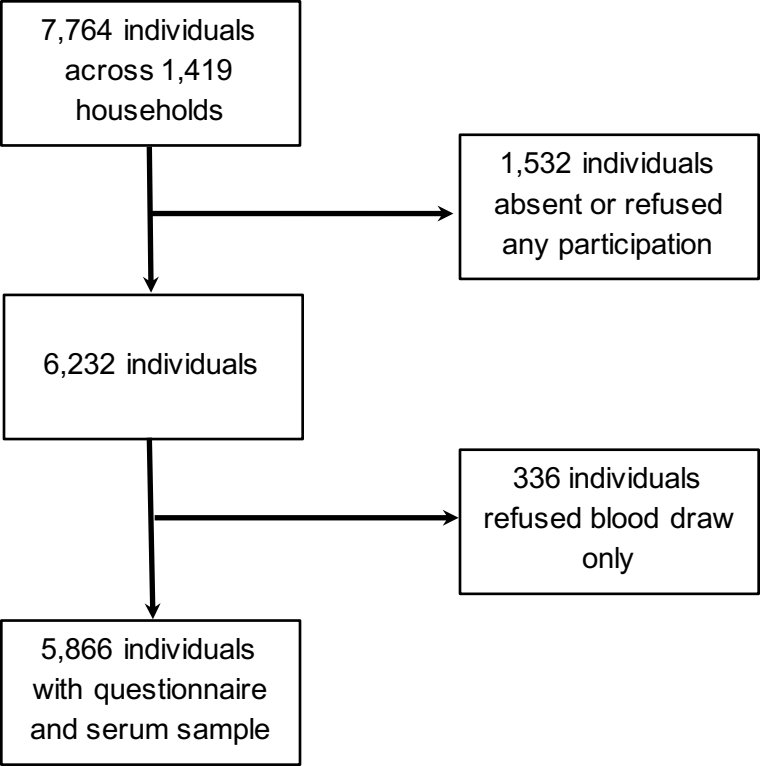

Supplement: supp [file elife-42869-supp-v1.zip › elife_poa_e42869_Figure_1_figure_supplement_1.pdf]
