# Supplementary figures and images for: Nationally-representative serostudy of dengue in Bangladesh allows generalizable disease burden estimates
Source: eLife journal article supplement (doi:10.7554/elife.42869), 2019-04-08

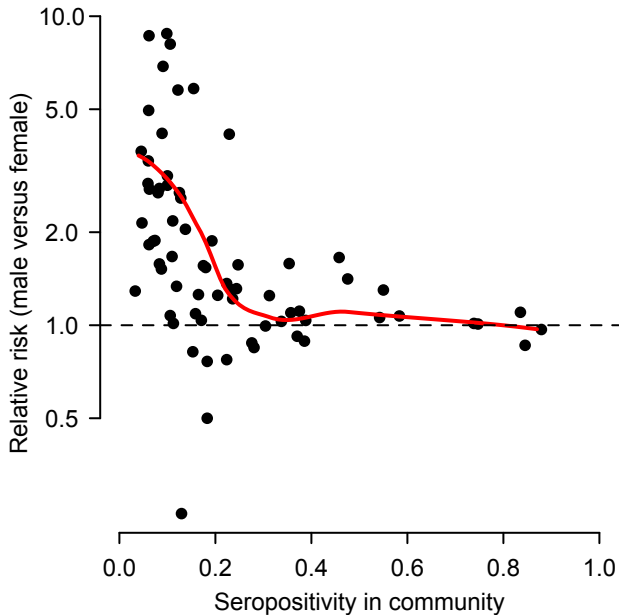

Supplement: supp [file elife-42869-supp-v1.zip › elife_poa_e42869_Figure_2_figure_supplement_1.pdf]

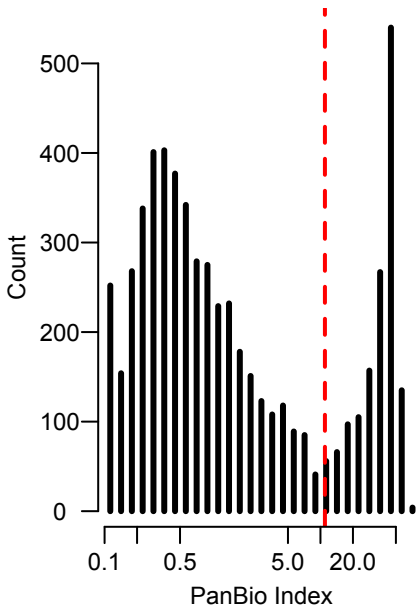

Supplement: supp [file elife-42869-supp-v1.zip › elife_poa_e42869_Figure_1_figure_supplement_3.pdf]

**A**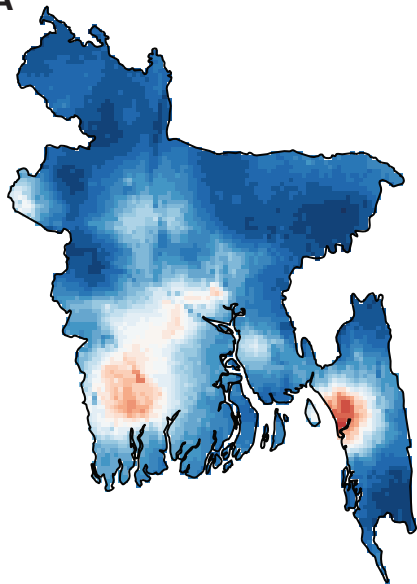**B**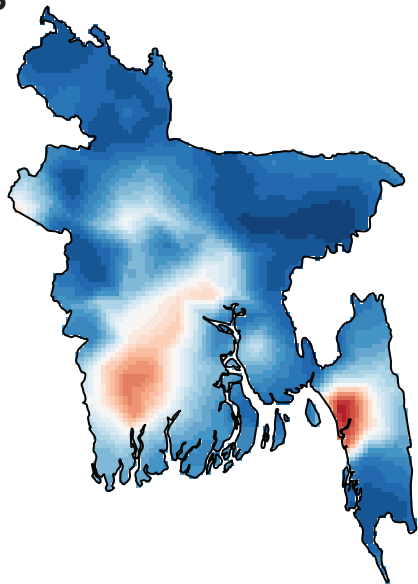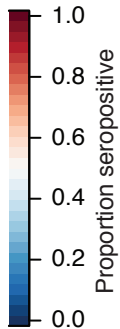

Supplement: supp [file elife-42869-supp-v1.zip › elife_poa_e42869_Figure_2_figure_supplement_3.pdf]

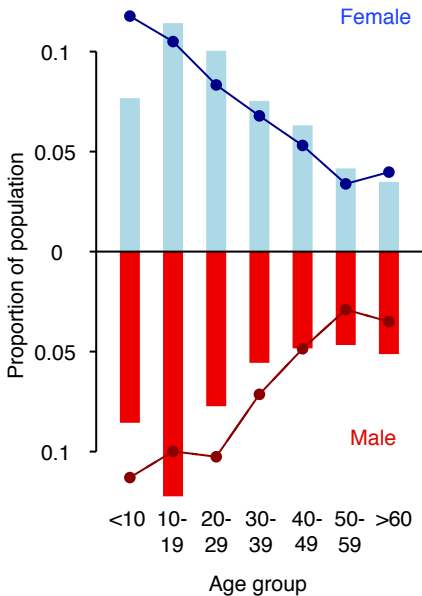

Supplement: supp [file elife-42869-supp-v1.zip › elife_poa_e42869_Figure_1_figure_supplement_2.pdf]

Proportion seropositive

0.3  
0.2  
0.1  
0.0

0 20 40 60  
Age

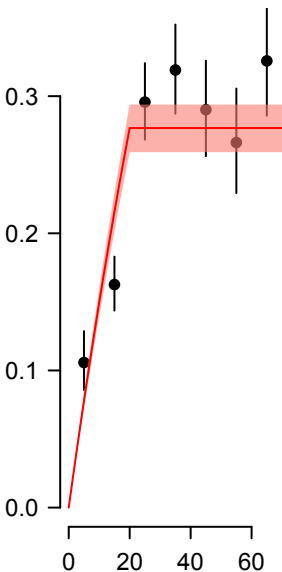

Supplement: supp [file elife-42869-supp-v1.zip › elife_poa_e42869_Figure_2_figure_supplement_4.pdf]

## A. Individual level covariates

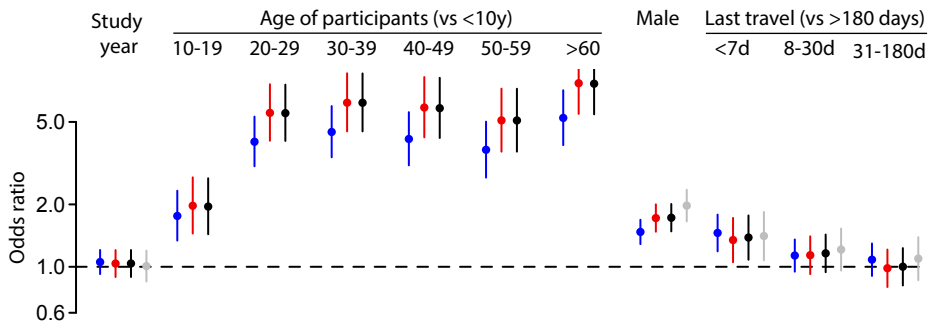

## B. Household level covariates

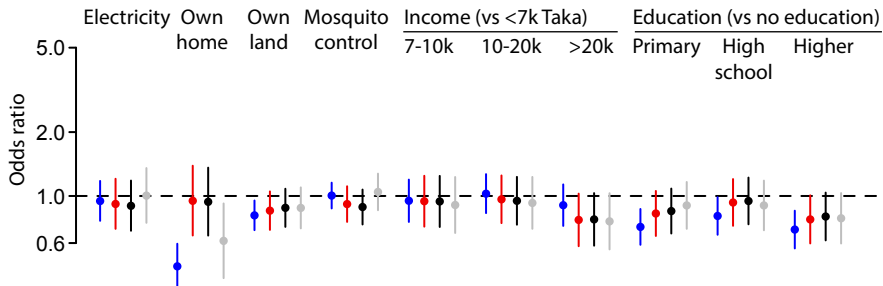

## C. Village level covariates

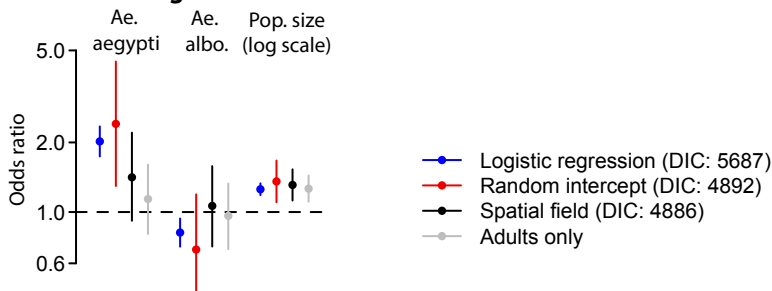

Supplement: supp [file elife-42869-supp-v1.zip › elife_poa_e42869_Figure_2_figure_supplement_2.pdf]
